# Supplementary material for: Effect of Sample Preparation on the Detection and Quantification of Selected Nuts Allergenic Proteins by LC-MS/MS
Source: MDPI journal article supplement (doi:10.3390/molecules26154698), 2021-08-03
Supplement: s1 [file s1]

## **Supplementary Material**

### **Effect of sample preparation on the detection and quantification of selected nuts allergenic proteins by LC-MS/MS**

**Sorel Tchewonpi Sagu <sup>1</sup>, Gerd Huschek <sup>2</sup>, Thomas Homann <sup>1</sup> and Harshadrai M. Rawel <sup>1\*</sup>**

1. University of Potsdam. Institute of Nutritional Science. Arthur-Scheunert-Allee 114-116. 14558 Nuthetal. Potsdam. Germany; sorelsagu@uni-potsdam.de (S.T.S.); thomas.homann@uni-potsdam.de (T.H.)
2. IGV-Institut für Getreideverarbeitung GmbH. Arthur-Scheunert-Allee 40/41. D-14558. Nuthetal OT Bergholz-Rehbrücke. Germany; gerd.huschek@igv-gmbh.de (G.H.)

\* Corresponding author.

Tel: +49-33200-88-5525/5578 (H.R.)

E-mail: rawel@uni-potsdam.de

## **Content**

**Figure S1.** Extracted protein (a) and protein extraction yield of nut samples almond, cashew, hazelnut, peanut, pistachio and walnut using Ambi/urea, CM/NaCl, PVPP, SDS and TCA methods

**Figure S2,** Relative composition of extracted proteins of (a) almond, cashew, hazelnut, and (b) peanut, pistachio and walnut using Ambi/urea, CM/NaCl, PVPP, SDS and TCA methods. The composition of proteins was fragmented in four ranges: 0 – 15 kDa, 15 – 35 kDa, 35 – 70 kDa and 70 – 250 kDa. The volume tools of Image Lab software was used to determine the intensities applying the local subtraction method for the background

**Figure S3.** Linearity of the HPLC-MS/MS measurements of internal standards (a) GWGG and (b) DPLNVLKPR

**Figure S4.** Linearity of the HPLC-MS/MS measurements of analyzed almond allergenic proteins (a) Cysteine rich antimicrobial protein (A0A516F3L2), (b) Prunin 1 Pru du 6.0101 (E3SH28), (c) Profilin (Q8GSL5) and (d) (R)-mandelonitrile lyase 2 (Q945K2)

**Figure S5.** Linearity of the HPLC-MS/MS measurements of analyzed cashew allergenic proteins (a) 11S globulin seed storage protein Ana o 2.0101 Fragment (Q8GZP6), (b) 2s albumin (Q8H2B8) and (c) Vicilin-like protein (Q8L5L5)

**Figure S6.** Linearity of the HPLC-MS/MS measurements of analyzed hazelnut allergenic proteins (a) Isoflavone reductase (A0A0U1VZC8), (b) 2S albumin (D0PWG2), (c) Vicilin Cor a 11.0101 (Q8S4P9) and (d) Non-specific lipid-transfer protein Cor a 8.0101 (Q9ATH2).

**Figure S7.** Linearity of the HPLC-MS/MS measurements of analyzed peanut allergenic proteins (a) Non-specific lipid-transfer protein (B6CEX8), (b) Conglutin-7 (Q6PSU2), (c) Conglutin (Q647G9) and (d) Glycinin Fragment (O82580).

**Figure S8.** Linearity of the HPLC-MS/MS measurements of analyzed pistachio allergenic proteins (a) Superoxide dismutase (B2BDZ8), (b) Pis v 1 allergen 2S albumin (B7P072), (c) Pis v 2.0101 allergen 11S globulin precursor (B7P073) and (d) Pis v 5.0101 allergen 11S globulin precursor (B7SLJ1)

**Figure S9.** Linearity of the HPLC-MS/MS measurements of analyzed walnut allergenic proteins (a) 11S globulin (A0A1L6K371), (b) Vicilin Jug r 6.0101 (A0A2I4E5L6), (c) 2S albumin seed storage protein Fragment (P93198) and (d) 11S globulin seed storage protein Jug r 4 (Q2TPW5)

**Figure S10.** Recovery of the injected internal standards (a) GWGG and (b) DPLNV(d8)LKPR in the different nut matrixes according to the extraction protocols: ammonium bicarbonate/urea (Ambi/urea), chloroform/methanol/sodium chloride (CM/NaCl), polyvinylpyrrolidone (PVPP), sodium dodecyl sulfate (SDS) and trichloroacetic acid (TCA). The results are expressed as ng internal standard detected (n=3)

**Figure S11** Sum of the relative amount of selected allergenic proteins of (a) almond, (b) cashew, (c) hazelnut, (d) peanut, (e) pistachio and (f) walnut expressed as peak area per mg of defatted nut flour according to the different extractions protocols: ammonium bicarbonate/urea (Ambi/urea), chloroform/methanol/sodium chloride (CM/NaCl), polyvinylpyrrolidone (PVPP), Sodium dodecyl sulfate (SDS) and trichloroacetic acid (TCA). The quantification was performed using the different biomarkers for each protein as determined through method development. Overnight tryptic conventional digestion was performed for all the samples and the experiments were carried out in triplicate (N=3).

**Figure S12** Sum of the relative amount of selected allergenic proteins of (a) almond, (b) cashew, (c) hazelnut, (d) peanut, (e) pistachio and (f) walnut expressed as peak area per mg of defatted nut flour according to the different digestion protocols (conventional and microwave assisted tryptic digestion). The quantification was performed using the different biomarkers for each protein as

determined through method development. The best extraction process was used for each nut sample (N=3).

**Table S1.** List of nut allergenic proteins available from the online database ALLERGEN NOMENCLATURE, the WHO/IUIS Allergen Nomenclature Sub-Committee ([http:// www.allergen.org](http://www.allergen.org); last accessed 13.06.2021). The information on the sequence of the primary chains and the pI were collected from the online database UniProtKB. MW is the molecular weight and AA is the number of amino acid residues.

**Table S2.** The optimized conditions of the HPLC-MS/MS method for the analysis and relative quantification of almond, cashew, hazelnut, peanut, pistachio and walnut allergenic proteins

**Table S3.** LC-MS/MS method validation results of almond allergenic proteins

**Table S4.** LC-MS/MS method validation results of cashew allergenic proteins

**Table S5.** LC-MS/MS method validation results of hazelnut allergenic proteins

**Table S6.** LC-MS/MS method validation results of peanut allergenic proteins

**Table S7.** LC-MS/MS method validation results of pistachio allergenic proteins

**Table S8.** LC-MS/MS method validation results of walnut allergenic proteins

**Table S9.** LC-MS/MS method validation results of two peptides used as internal standards

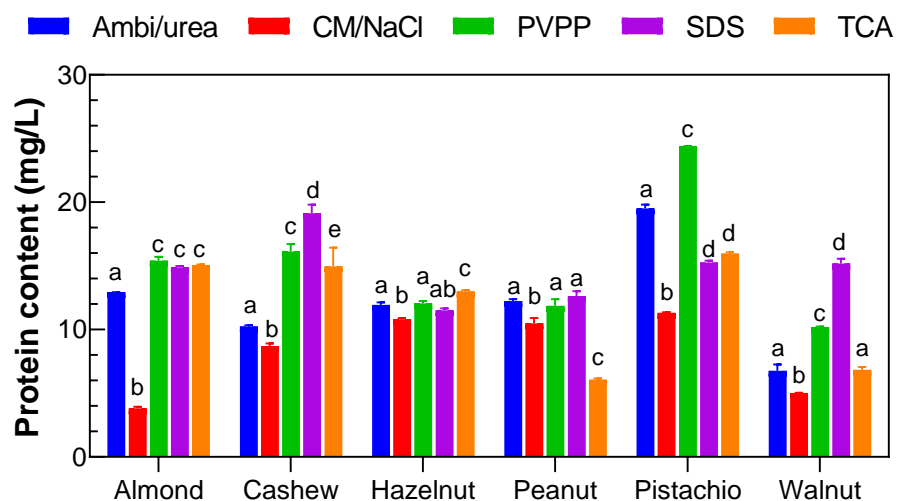

(a)

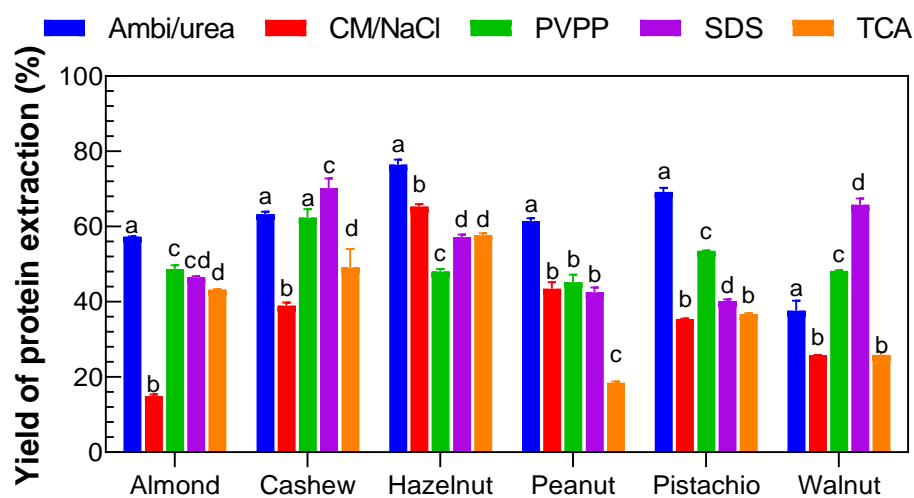

(b)

**Figure S1.** Extracted protein (a) and protein extraction yield of nut samples almond, cashew, hazelnut, peanut, pistachio and walnut using Ambi/urea, CM/NaCl, PVPP, SDS and TCA methods. Different letters indicating statistically significant differences at  $p=0.05$  (Tukey test).

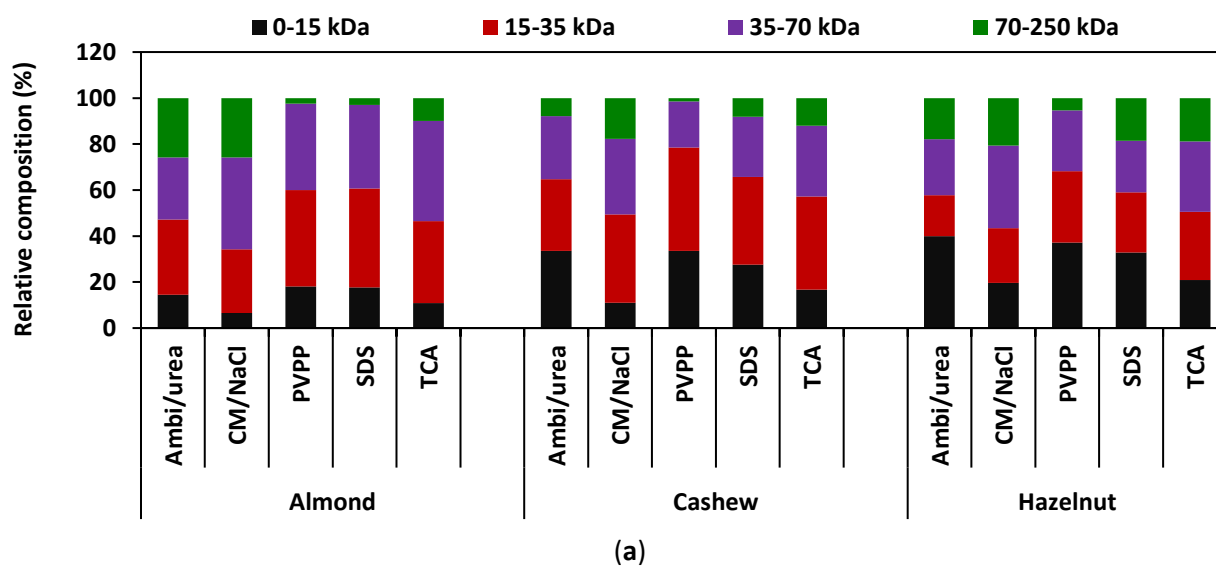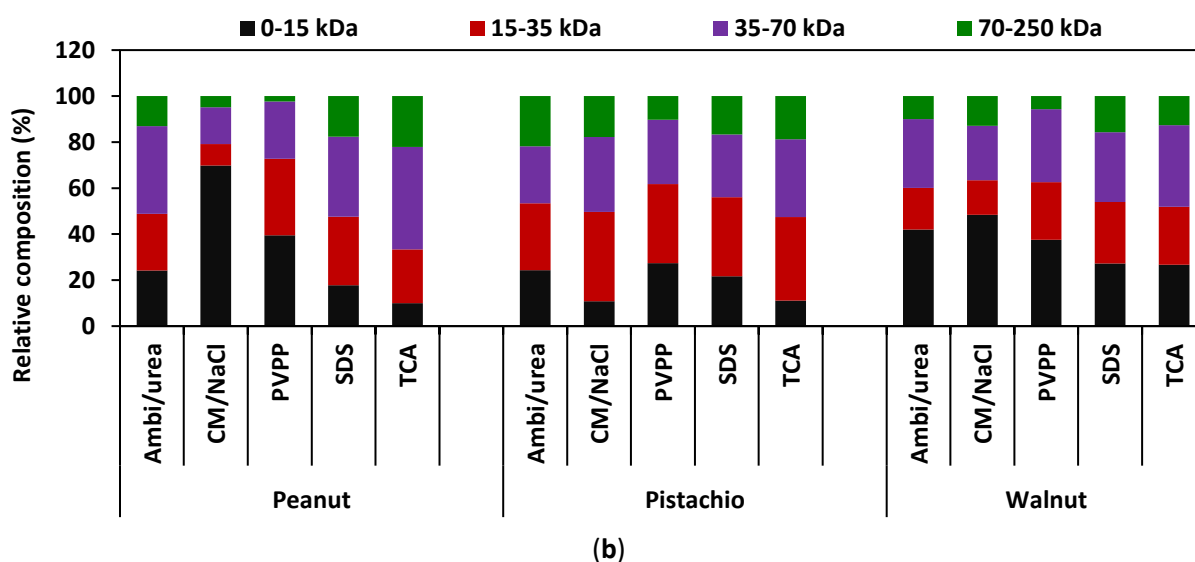

**Figure S2.** Relative composition of extracted proteins of (a) almond, cashew, hazelnut, and (b) peanut, pistachio and walnut using Ambi/urea, CM/NaCl, PVPP, SDS and TCA methods. The composition of proteins was fragmented in four ranges: 0 – 15 kDa, 15 – 35 kDa, 35 – 70 kDa and 70 – 250 kDa. The volume tools of Image Lab software was used to determine the intensities applying the local subtraction method for the background.

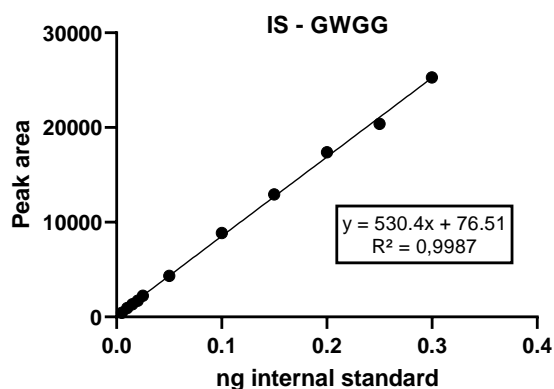

(a)

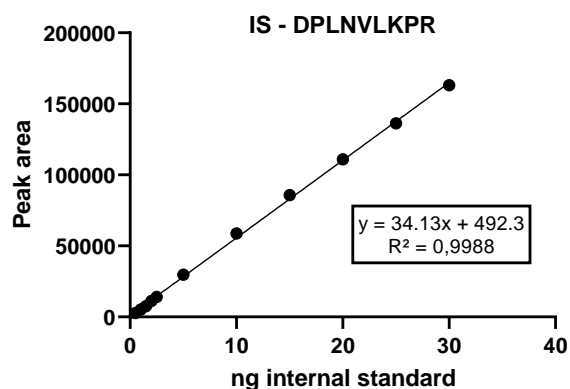

(b)

**Figure S3.** Linearity of the HPLC-MS/MS measurements of internal standards (a) GWGG and (b) DPLNLVKPR

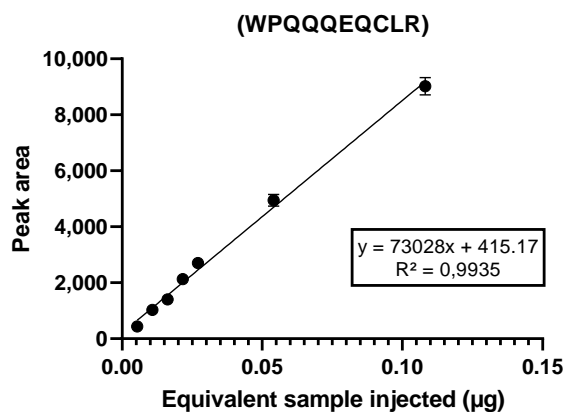

(a)

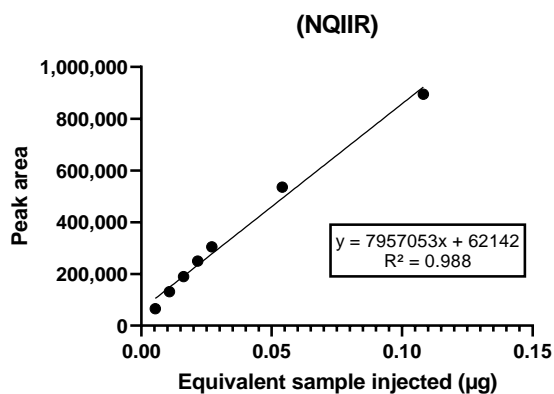

(b)

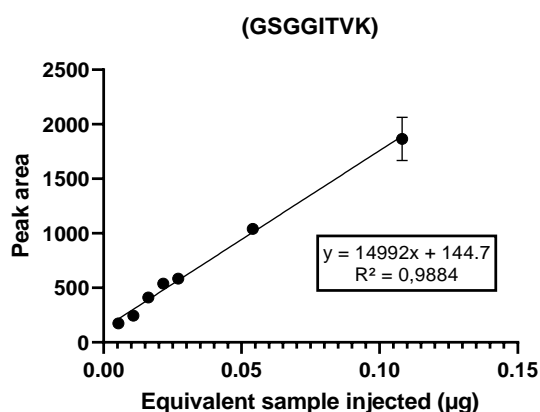

(c)

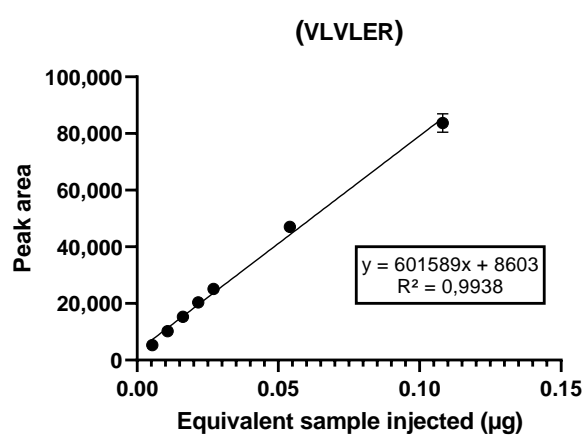

(d)

**Figure S4.** Linearity of the HPLC-MS/MS measurements of analyzed almond allergenic proteins (a) Cysteine rich antimicrobial protein (A0A516F3L2), (b) Prunin 1 Pru du 6.0101 (E3SH28), (c) Profilin (Q8GSL5) and (d) (R)-mandelonitrile lyase 2 (Q945K2)

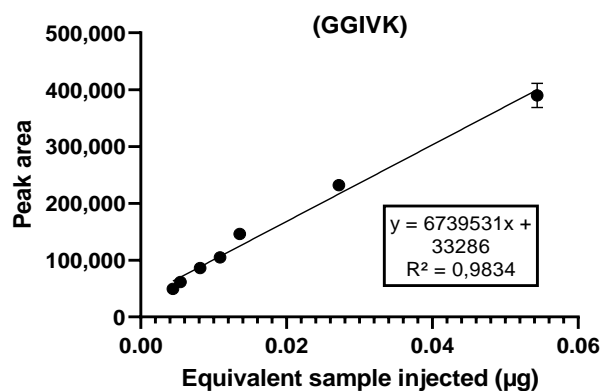

(a)

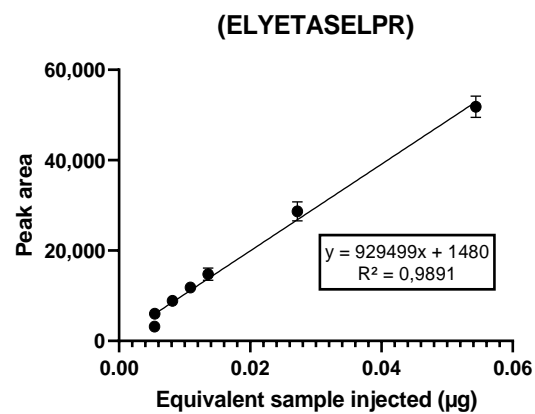

(b)

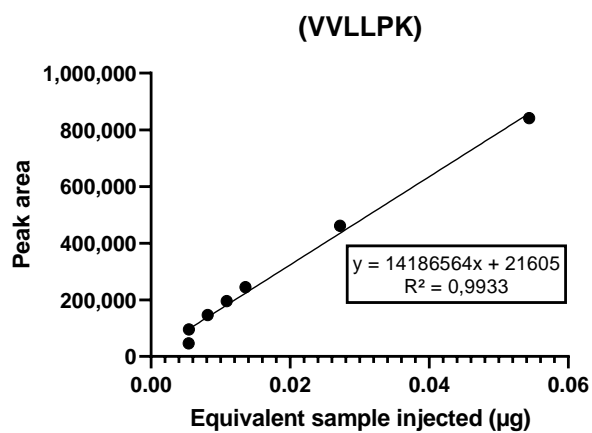

(c)

**Figure S5.** Linearity of the HPLC-MS/MS measurements of analyzed cashew allergenic proteins (a) 11S globulin seed storage protein Ana o 2.0101 Fragment (Q8GZP6), (b) 2s albumin (Q8H2B8) and (c) Vicilin-like protein (Q8L5L5)

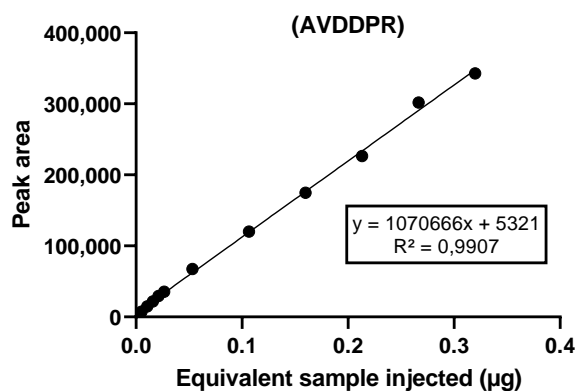

(a)

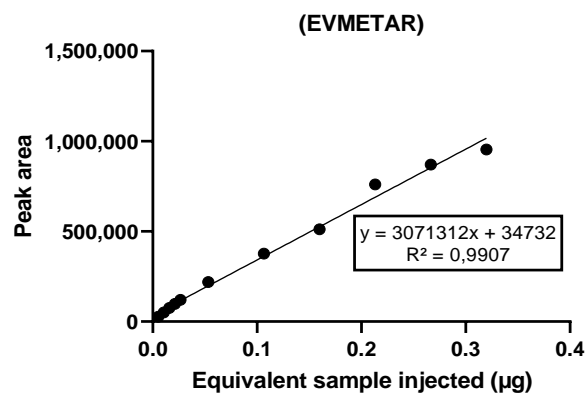

(b)

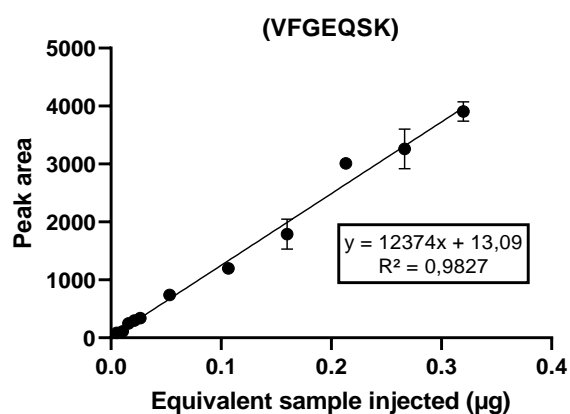

(c)

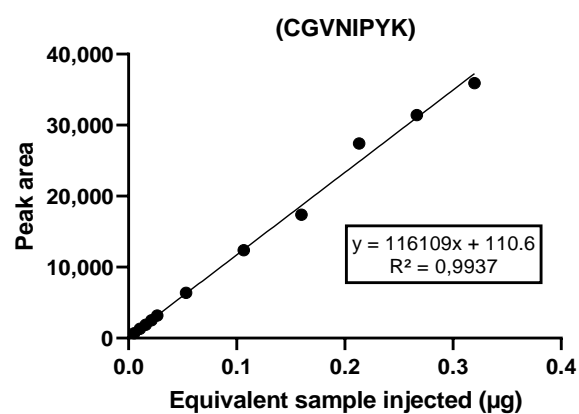

(d)

**Figure S6.** Linearity of the HPLC-MS/MS measurements of analyzed hazelnut allergenic proteins (a) Isoflavone reductase (A0A0U1VZC8), (b) 2S albumin (D0PWG2), (c) Vicilin Cor a 11.0101 (Q8S4P9) and (d) Non-specific lipid-transfer protein Cor a 8.0101 (Q9ATH2).

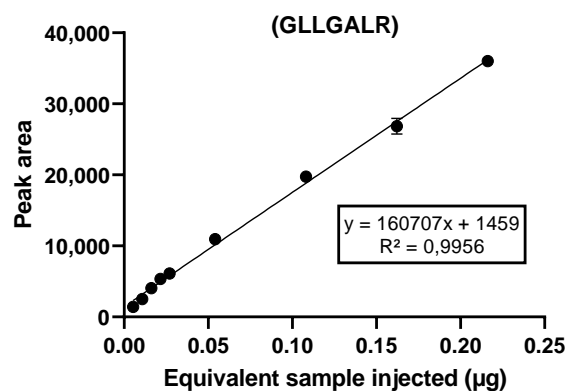

(a)

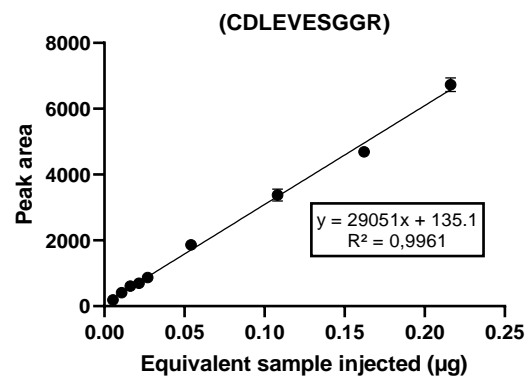

(b)

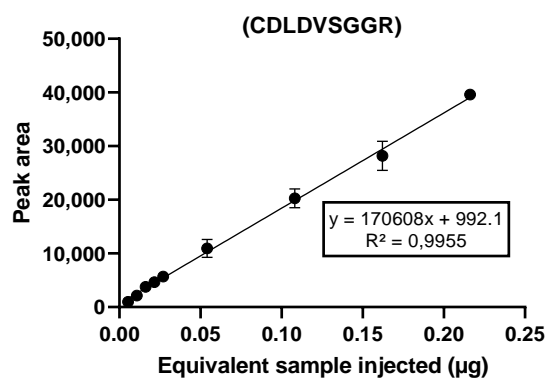

(c)

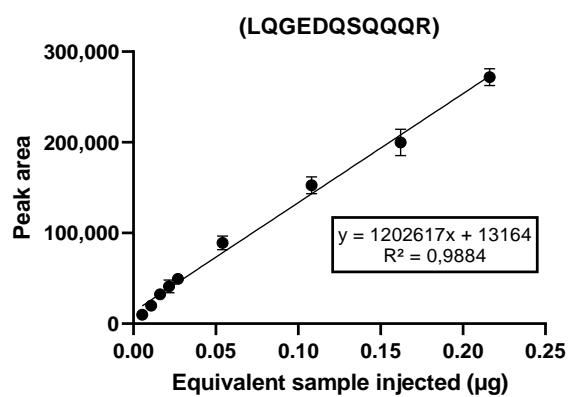

(d)

**Figure S7.** Linearity of the HPLC-MS/MS measurements of analyzed peanut allergenic proteins (a) Non-specific lipid-transfer protein (B6CEX8), (b) Conglutin-7 (Q6PSU2), (c) Conglutin (Q647G9) and (d) Glycinin Fragment (O82580).

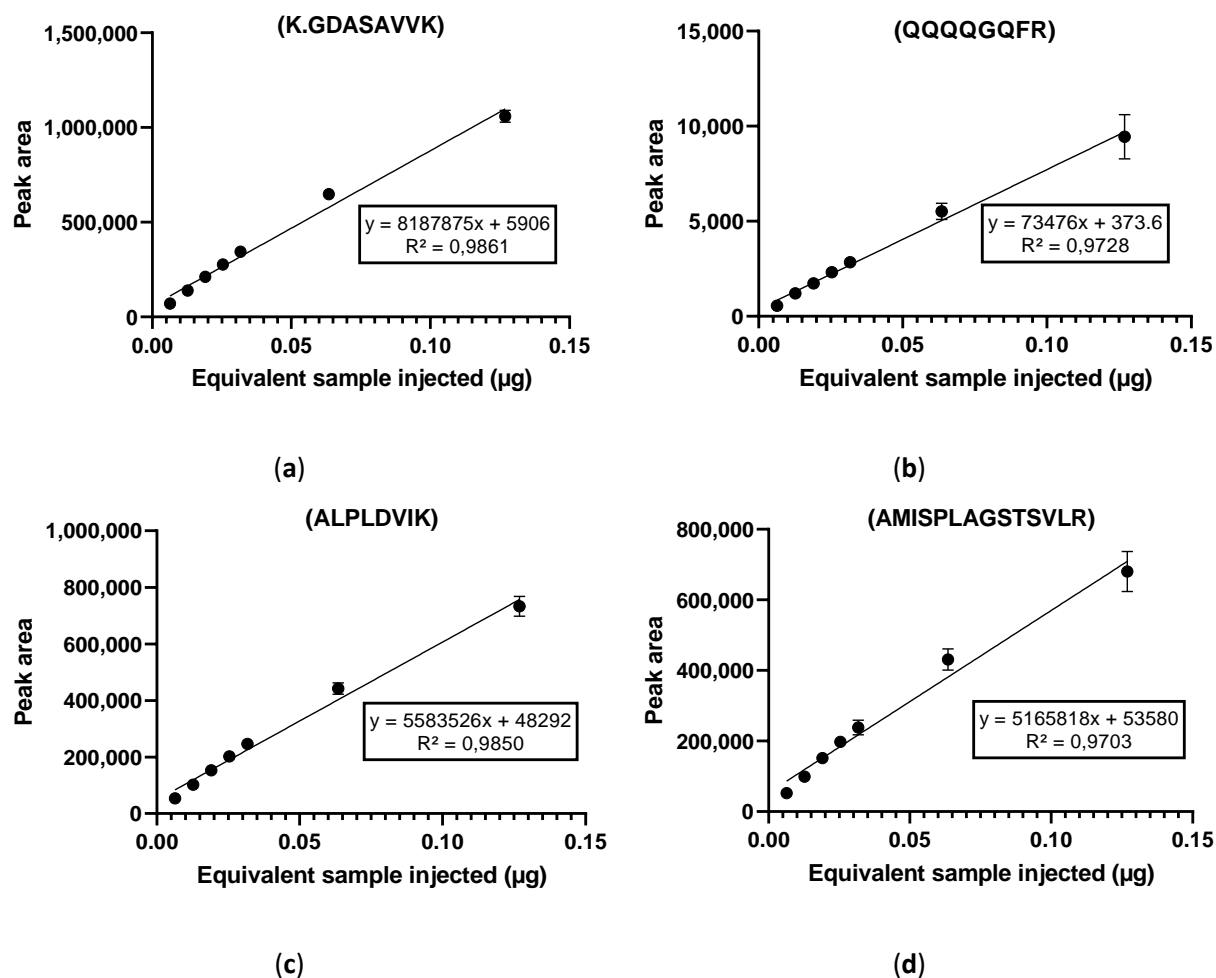

**Figure S8.** Linearity of the HPLC-MS/MS measurements of analyzed pistachio allergenic proteins (a) Superoxide dismutase (B2BDZ8), (b) Pis v 1 allergen 2S albumin (B7P072), (c) Pis v 2.0101 allergen11S globulin precursor (B7P073) and (d) Pis v 5.0101 allergen 11S globulin precursor (B7SLJ1)

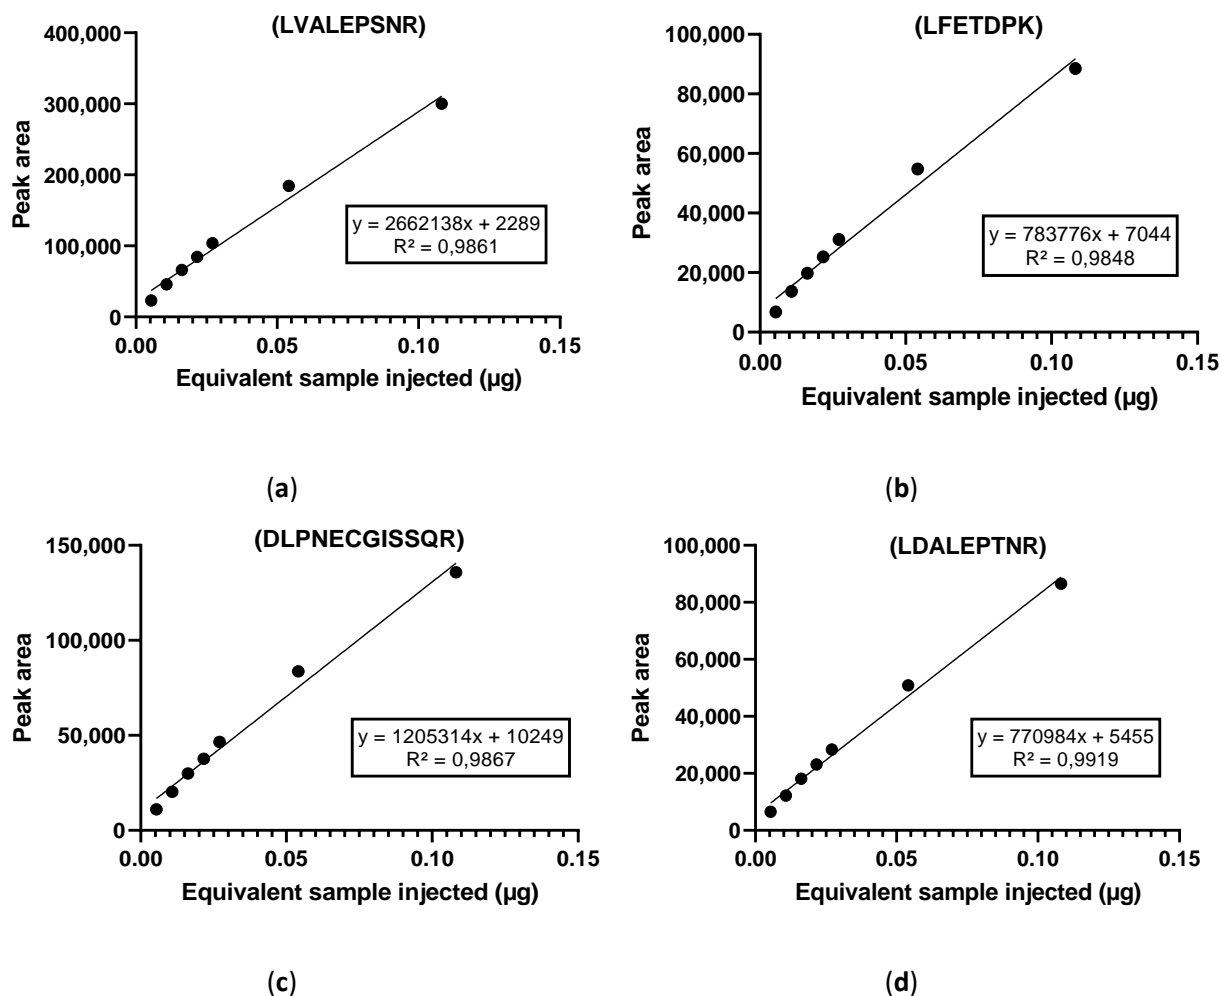

**Figure S9.** Linearity of the HPLC-MS/MS measurements of analyzed walnut allergenic proteins (a) 11S globulin (A0A1L6K371), (b) Vicilin Jug r 6.0101 (A0A2I4E5L6), (c) 2S albumin seed storage protein Fragment (P93198) and (d) 11S globulin seed storage protein Jug r 4 (Q2TPW5).

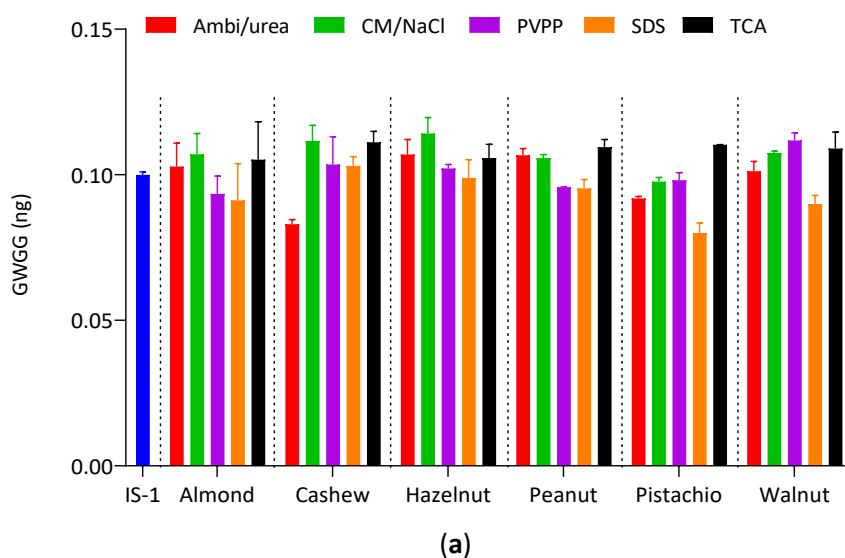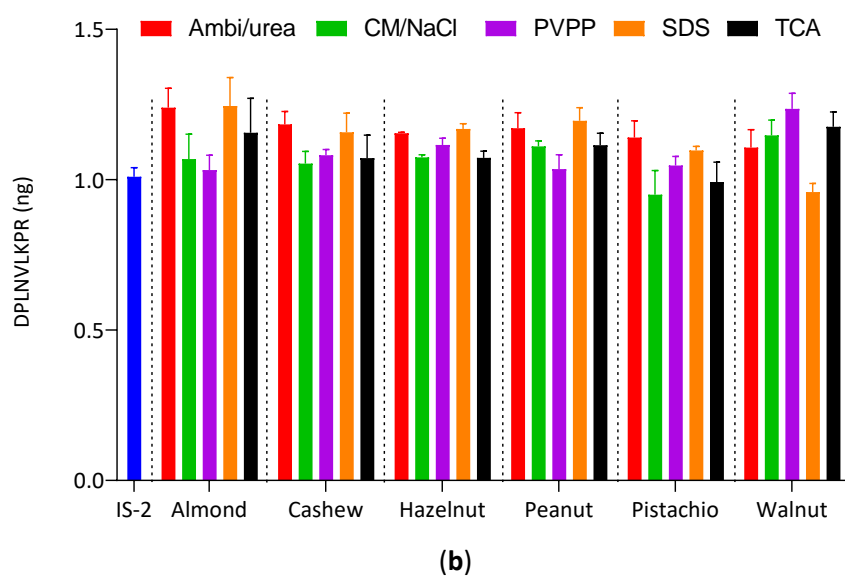

**Figure S10.** Recovery of the injected internal standards (a) GWGG and (b) DPLNV(d8)LKPR in the different nut matrixes according to the extraction protocols: ammonium bicarbonate/urea (Ambi/urea), chloroform/methanol/sodium chloride (CM/NaCl), polyvinylpyrrolidone (PVPP), sodium dodecyl sulfate (SDS) and trichloroacetic acid (TCA). The results are expressed as ng internal standard detected (n=3).

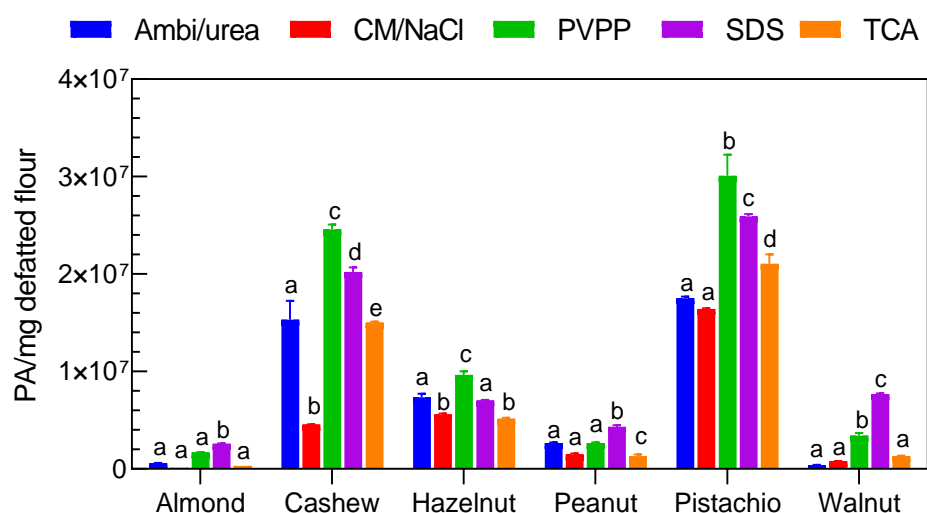

**Figure S11** Sum of the relative amount of selected allergenic proteins of (a) almond, (b) cashew, (c) hazelnut, (d) peanut, (e) pistachio and (f) walnut expressed as peak area per mg of defatted nut flour according to the different extractions protocols: ammonium bicarbonate/urea (Ambi/urea), Chloroform/methanol/sodium chloride (CM/NaCl), polyvinylpyrrolidone (PVPP), Sodium dodecyl sulfate (SDS) and trichloroacetic acid (TCA). The quantification was performed using the different biomarkers for each protein as determined through method development. Overnight tryptic conventional digestion was performed for all the samples and the experiments were carried out in triplicate (N=3). Different letters indicating statistically significant differences at  $p=0.05$  (Tukey test).

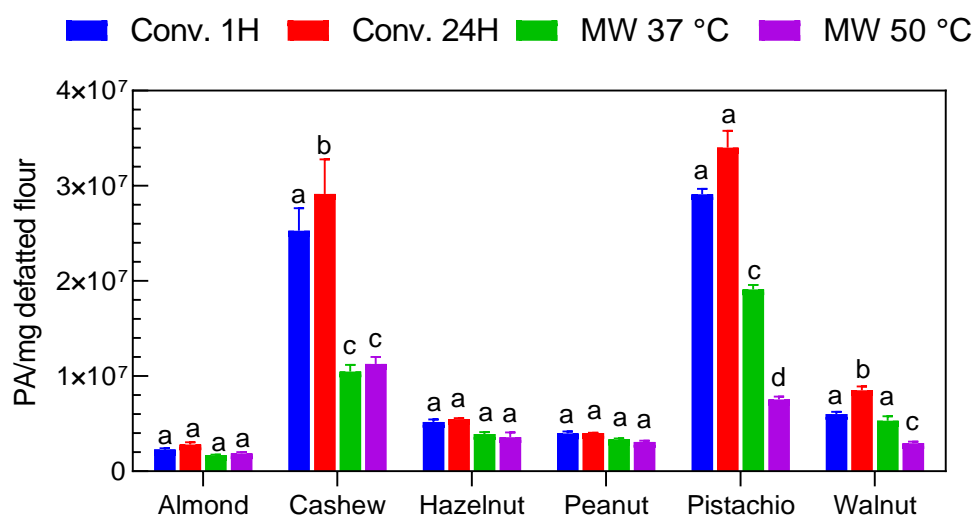

**Figure S12** Sum of the relative amount of selected allergenic proteins of (a) almond, (b) cashew, (c) hazelnut, (d) peanut, (e) pistachio and (f) walnut expressed as peak area per mg of defatted nut flour according to the different digestion protocols (conventional and microwave assisted tryptic digestion). The quantification was performed using the different biomarkers for each protein as determined through method development. The best extraction process was used for each nut sample (N=3). Different letters indicating statistically significant differences at  $p=0.05$  (Tukey test).

**Table S1.** List of nut allergenic proteins available from the online database ALLERGEN NOMENCLATURE, the WHO/IUIS Allergen Nomenclature Sub-Committee ([http:// www.allergen.org](http://www.allergen.org); last accessed 13.06.2021). The information on the sequence of the primary chains was collected from the online database online database UniProtKB. AA is the number of amino acid residues.

| Nut sample      | Allergen  | Biochemical name                                           | Route of Allergen Exposure | Uniprot entry | Molecular Weight | Length (AA) |
|-----------------|-----------|------------------------------------------------------------|----------------------------|---------------|------------------|-------------|
| <b>Almond</b>   | Pru du 3  | Non-specific lipid transfer protein 1 (nsLTP1)             | Food                       | COL0I5        | 9 kDa            | 102         |
|                 | Pru du 4  | Profilin                                                   | Food                       | Q8GSL5        | 14 kDa           | 130         |
|                 | Pru du 5  | 60s acidic ribosomal prot. P2                              | Food                       | Q8H2B9        | 10 kDa           | 113         |
|                 | Pru du 6  | Amandin 11S globulin legumin-like protein                  | Food                       | E3SH28        | ca. 360 kDa      | 551         |
|                 | Pru du 8  | Antimicrobial seed storage protein                         | Food                       | A0A516F3L2    | 31 kDa           | 264         |
|                 | Pru du 10 | Mandelonitrile lyase 2                                     | Food                       | Q945K2        | 60 kDa           | 563         |
| <b>Cashew</b>   | Ana o 1   | Vicilin-like protein                                       | Food                       | Q8L5L5        | 50 kDa           | 538         |
|                 | Ana o 2   | Legumin-like protein                                       | Food                       | Q8GZP6        | 55 kDa           | 457         |
|                 | Ana o 3   | 2S albumin                                                 | Food                       | Q8H2B8        | 14 kDa           | 138         |
| <b>Hazelnut</b> | Cor a 1   | Pathogenesis-related protein. PR-10. Bet v 1 family member | Airway                     | Q08407        | 17 kDa           | 160         |
|                 | Cor a 2   | Profilin                                                   | Food                       | Q9AXH5        | 14 kDa           | 131         |
|                 | Cor a 6   | Isoflavone reductase homologue                             | Airway                     | A0A0U1VZC8    | 35 kDa           | 308         |
|                 | Cor a 8   | Non-specific lipid transfer protein type 1                 | Food                       | Q9ATH2        | 9 kDa            | 115         |
|                 | Cor a 9   | 11S seed storage globulin (legumin-like)                   | Food                       | Q8W1C2        | 40 kDa           | 515         |
|                 | Cor a 10  | Luminal binding protein                                    | Airway                     | Q9FSY7        | 70 kDa           | 668         |
|                 | Cor a 11  | 7S seed storage globulin (vicilin-like)                    | Food                       | Q8S4P9        | 48 kDa           | 448         |
|                 | Cor a 12  | 17 kDa oleosin                                             | Food                       | Q84T21        | 17 kDa           | 159         |
|                 | Cor a 13  | 14-16 kDa oleosin                                          | Food                       | Q84T91        | 14-16 kDa        | 140         |
|                 | Cor a 14  | 2S albumin                                                 | Food                       | D0PWG2        | 10 kDa reducing  | 147         |

**Table S1.** Continued

| Nut sample | Allergen | Biochemical name                                                   | Route of Allergen Exposure | Uniprot entry | MW (Da)                                                   | Length (AA) |
|------------|----------|--------------------------------------------------------------------|----------------------------|---------------|-----------------------------------------------------------|-------------|
| Peanut     | Ara h 1  | Cupin (Vicillin-type. 7S globulin)                                 | Food                       | P43238        | 64 kDa                                                    | 626         |
|            | Ara h 2  | Conglutin (2S albumin)                                             |                            | Q6PSU2        | 17 kDa                                                    | 172         |
|            | Ara h 3  | Cupin (Legumin-type. 11S globulin. Glycinin)                       |                            | O82580        | 60 kDa. 37 kDa (fragment)                                 | 507         |
|            | Ara h 4  | renamed to Ara h 3.02. number not available for future submissions |                            | Q9SQH7        | 61.1 kDa                                                  | 530         |
|            | Ara h 5  | Profilin                                                           |                            | Q9SQI9        | 15 kDa                                                    | 131         |
|            | Ara h 6  | Conglutin (2S albumin)                                             |                            | Q647G9        | 15 kDa                                                    | 145         |
|            | Ara h 7  | Conglutin (2S albumin)                                             |                            | Q9SQH1        | 15 kDa                                                    | 160         |
|            | Ara h 8  | Pathogenesis-related protein. PR-10. Bet v 1 family member         |                            | Q6VT83        | 17 kDa                                                    | 157         |
|            | Ara h 9  | Nonspecific lipid-transfer protein type 1                          |                            | B6CEX8        | 9.8 kDa                                                   | 116         |
|            | Ara h 10 | oleosin                                                            |                            | Q647G5        | 16 kDa                                                    | 169         |
|            | Ara h 11 | oleosin                                                            |                            | Q45W87        | 14 kDa                                                    | 137         |
|            | Ara h 12 | Defensin                                                           |                            | B3EWP3        | 8 kDa (reducing). 12 kDa (non-reducing). 5.184 kDa (mass) | 71          |
|            | Ara h 13 | Defensin                                                           |                            | B3EWP4        | 8 kDa (reducing). 11 kDa (non-reducing). 5.472 kDa (mass) | 79          |
|            | Ara h 14 | Oleosin                                                            |                            | Q9AXI1        | 17.5 kDa                                                  | 176         |
|            | Ara h 15 | Oleosin                                                            |                            | Q647G3        | 17 kDa                                                    | 166         |
|            | Ara h 16 | non-specific Lipid Transfer Protein 2                              |                            | A0A509ZX51    | 8.5 kDa by SDS PAGE reducing                              | 68          |
|            | Ara h 17 | non-specific Lipid Transfer Protein 1                              |                            | A0A510A9S3    | 11 kDa by SDS-PAGE reducing                               | 93          |
|            | Ara h 18 | Cyclophilin - peptidyl-prolyl cis-trans isomerase                  |                            | A0A444XS96    | 21 kDa                                                    | 226         |

**Table S1.** Continued

| Nut sample            | Allergen | Biochemical name                                    | Route of Allergen Exposure | Uniprot entry | MW (Da)                 | Length (AA) |
|-----------------------|----------|-----------------------------------------------------|----------------------------|---------------|-------------------------|-------------|
| <b>Pistachio</b>      | Pis v 1  | 2S albumin                                          | Food                       | B7P072        | 7 kDa                   | 149         |
|                       | Pis v 2  | 11S globulin subunit                                | Food                       | B7P073        | 32 kDa                  | 496         |
|                       | Pis v 3  | vicillin                                            | Food                       | B4X640        | 55 kDa                  | 545         |
|                       | Pis v 4  | manganese superoxide dismutase                      | Food                       | B2BDZ8        | 25.7 kDa                | 230         |
|                       | Pis v 5  | 11S globulin subunit                                | Food                       | B7SLJ1        | 36 kDa (acidic subunit) | 473         |
| <b>Black Walnut</b>   | Jug n 1  | 2S albumin seed storage protein                     | Food                       | Q7Y1C2        | 18.9 kDa                | 161         |
|                       | Jug n 2  | Vicilin seed storage protein                        | Food                       | Q7Y1C1        | 55.6 kDa                | 481         |
|                       | Jug n 4  | Legumin                                             | Food                       | A0A1L6K371    | 58.1 kDa                | 510         |
| <b>English walnut</b> | Jug r 1  | 2S albumin seed storage protein                     | Food                       | P93198        | 15-16 kDa               |             |
|                       | Jug r 2  | Vicilin seed storage protein                        | Food                       | Q9SEW4        | 44 kDa                  | 139         |
|                       | Jug r 3  | Non-specific lipid transfer protein type 1 (nsLTP1) | Food                       | C5H617        | 9 kDa                   | 119         |
|                       | Jug r 4  | 11S globulin seed storage protein                   | Food                       | Q2TPW5        | 58.1 kDa                | 507         |
|                       | Jug r 5  | PR-10                                               | Food                       | -             | 20 kDa                  | -           |
|                       | Jug r 6  | vicilin-like cupin                                  | Food                       | A0A2I4E5L6    | 47 kDa                  | 502         |
|                       | Jug r 7  | Profilin                                            | Food                       | A0A2I4DNN6    | 13 kDa                  | 131         |
|                       | Jug r 8  | ns-LTP-2                                            | Food                       | -             | 9 kDa                   | -           |



**Table S2.** The optimized conditions of the HPLC-MS/MS method for the analysis and relative quantification of almond, cashew, hazelnut, peanut, pistachio and walnut allergenic proteins.

|        | Allergenic protein | Biomarker peptide            | Precursor Ion | Fragment | Product Ion | Collision Energy | Retention time (min) |
|--------|--------------------|------------------------------|---------------|----------|-------------|------------------|----------------------|
| Almond | A0A516F3L2         | WPQQQEQC[+57.021464]LR.light | 686.82496     | Q [y6]   | 833.393412  | 28.3             | 9.6                  |
|        |                    |                              |               | E [y5]   | 705.334835  | 31.3             |                      |
|        |                    |                              |               | Q [y4]   | 576.292242  | 31.3             |                      |
|        |                    |                              |               | P [b2]   | 284.139353  | 31.3             |                      |
|        | E3SH28             | NQIIR.light                  | 322.19793     | I [y3]   | 401.28708   | 8                | 7.8                  |
|        |                    |                              |               | I [y2]   | 288.203016  | 17               |                      |
|        |                    |                              |               | Q [b2]   | 243.108781  | 8                |                      |
|        |                    |                              |               | R [y1]   | 175.118952  | 20               |                      |
|        | Q8GSL5             | GSGGITVK.light               | 359.708328    | G [y5]   | 517.334424  | 15.2             | 9.9                  |
|        |                    |                              |               | T [y3]   | 347.228896  | 21.2             |                      |
|        |                    |                              |               | G [b4]   | 259.103696  | 12.2             |                      |
|        |                    |                              |               | V [y2]   | 246.181218  | 21.2             |                      |
|        | Q945K2             | VLVLER.light                 | 364.736888    | L [y5]   | 629.398087  | 15.3             | 10.2                 |
|        |                    |                              |               | V [y4]   | 516.314023  | 12.3             |                      |
|        |                    |                              |               | L [y3]   | 417.245609  | 9.3              |                      |

**Table S2.** Continued

|          | Allergenic protein | Biomarker peptide | Precursor Ion | Fragment | Product Ion | Collision Energy | Retention time (min) |
|----------|--------------------|-------------------|---------------|----------|-------------|------------------|----------------------|
| Cashew   | Q8GZP6             | GGIVK.light       | 237.157743    | I [y3]   | 359.265282  | 5.4              | 6.8                  |
|          |                    |                   |               | V [y2]   | 246.181218  | 8.4              |                      |
|          |                    |                   |               | K [y1]   | 228.134267  | 5.4              |                      |
|          |                    |                   |               | I [b3]   | 147.112804  | 11.4             |                      |
|          | Q8H2B8             | ELYETASELPR.light | 654.327524    | T [y7]   | 773.415194  | 21.3             | 10.5                 |
|          |                    |                   |               | A [y6]   | 672.367515  | 21.3             |                      |
|          |                    |                   |               | S [y5]   | 601.330401  | 18.3             |                      |
|          |                    |                   |               | P [y2]   | 272.171716  | 15.3             |                      |
|          | Q8H2B8             | AIVEVEEDSGR.light | 602.296224    | E [y6]   | 692.284573  | 16.7             | 12.4                 |
|          |                    |                   |               | S [y3]   | 413.239461  | 19.7             |                      |
|          |                    |                   |               | G [y2]   | 319.172444  | 16.7             |                      |
|          |                    |                   |               | E [b4]   | 232.140415  | 25.7             |                      |
|          | Q8L5L5             | VVLLPK.light      | 334.7389      | V [y5]   | 569.40211   | 11.4             | 10.4                 |
|          |                    |                   |               | L [y4]   | 470.333696  | 8.4              |                      |
|          |                    |                   |               | P [y2]   | 244.165568  | 14.4             |                      |
| Hazelnut | A0A0U1VZC8         | AVDDPR.light      | 336.669203    | P [y2]   | 498.219454  | 20.4             | 9.9                  |
|          |                    |                   |               | R [y1]   | 272.171716  | 20.4             |                      |
|          |                    |                   |               | P [b5]   | 175.118952  | 20.4             |                      |
|          | D0PWG2             | EVMETAR.light     | 418.202552    | M [y5]   | 607.286822  | 14               | 7.4                  |
|          |                    |                   |               | E [y4]   | 476.246337  | 14               |                      |
|          |                    |                   |               | T [y3]   | 347.203744  | 11               |                      |
|          |                    |                   |               | A [y2]   | 246.156066  | 11               |                      |
|          | Q8S4P9             | VFGEQSK.light     | 397.705785    | F [y6]   | 695.335881  | 13.3             | 7.8                  |
|          |                    |                   |               | G [y5]   | 548.267467  | 13.3             |                      |
|          |                    |                   |               | S [y2]   | 234.144832  | 22.3             |                      |

**Table S2.** Continued

|                  | Allergenic protein | Biomarker peptide            | Precursor Ion | Fragment | Product Ion | Collision Energy | Retention time (min) |
|------------------|--------------------|------------------------------|---------------|----------|-------------|------------------|----------------------|
| <b>Hazelnut</b>  | Q9ATH2             | C[+57.021464]GVNIPYK.light   | 475.741845    | N [y5]   | 634.355888  | 18.7             | 9.8                  |
|                  |                    |                              |               | P [y3]   | 407.228896  | 18.7             |                      |
|                  |                    |                              |               | G [b2]   | 317.127802  | 24.7             |                      |
|                  |                    |                              |               | V [b3]   | 218.059388  | 18.7             |                      |
| <b>Peanut</b>    | B6CEX8             | GLLGALR.light                | 350.229231    | R [y1]   | 341.218332  | 5.9              | 10.6                 |
|                  |                    |                              |               | L [b3]   | 284.196868  | 11.9             |                      |
|                  |                    |                              |               | G [b4]   | 175.118952  | 20.9             |                      |
|                  | O82580             | LQGEDQSQQQR.light            | 658.813104    | Q [y4]   | 559.294684  | 27.4             | 10.9                 |
|                  |                    |                              |               | G [b3]   | 543.240917  | 24.4             |                      |
|                  |                    |                              |               | D [b5]   | 299.171381  | 15.4             |                      |
|                  | Q647G9             | CDLDVSGGR.light              | 489.7191      | L [y7]   | 703.3733    | 16.2             | 8.4                  |
|                  |                    |                              |               | D [y6]   | 590.2893    | 19.2             |                      |
|                  |                    |                              |               | V [y5]   | 475.2623    | 19.2             |                      |
|                  |                    |                              |               | S [y4]   | 376.1939    | 16.2             |                      |
|                  | Q6PSU2             | C[+57.021464]DLEVESGGR.light | 561.24822     | E [y7]   | 733.347508  | 24.4             | 8.6                  |
|                  |                    |                              |               | V [y6]   | 604.304915  | 24.4             |                      |
|                  |                    |                              |               | E [y5]   | 505.236501  | 21.4             |                      |
|                  |                    |                              |               | L [b3]   | 389.148932  | 24.4             |                      |
| <b>Pistachio</b> | B2BDZ8             | GDASAVVK.light               | 373.705785    | A [y6]   | 574.355888  | 12.6             | 7.8                  |
|                  |                    |                              |               | S [y5]   | 503.318774  | 12.6             |                      |
|                  |                    |                              |               | A [y4]   | 416.286745  | 12.6             |                      |
|                  |                    |                              |               | V [y2]   | 246.181218  | 12.6             |                      |
|                  | B7P072             | QQQQGQFR.light               | 510.254497    | Q [y5]   | 635.325985  | 16.8             | 7.0                  |
|                  |                    |                              |               | G [y4]   | 507.267407  | 16.8             |                      |
|                  |                    |                              |               | F [y2]   | 322.187366  | 16.8             |                      |

**Table S2.** Continued

|           | Allergenic protein | Biomarker peptide              | Precursor Ion | Fragment | Product Ion | Collision Energy | Retention time (min) |
|-----------|--------------------|--------------------------------|---------------|----------|-------------|------------------|----------------------|
| Pistachio | B7P073             | ALPLDVIK.light                 | 434.778753    | P [y6]   | 684.429053  | 14.5             | 12.1                 |
|           |                    |                                |               | L [y5]   | 587.376289  | 14.5             |                      |
|           |                    |                                |               | D [y4]   | 474.292225  | 14.5             |                      |
|           |                    |                                |               | I [y2]   | 260.196868  | 14.5             |                      |
|           | B7SLJ1             | AMISPLAGSTSVLR.light           | 701.889769    | P [y10]  | 1000.578571 | 22.8             | 12.3                 |
|           |                    |                                |               | M [b2]   | 403.200967  | 22.8             |                      |
|           |                    |                                |               | I [b3]   | 316.168938  | 22.8             |                      |
|           |                    |                                |               | S [b4]   | 203.084874  | 22.8             |                      |
| Walnut    | A0A1L6K371         | LVALEPSNR.light                | 499.785098    | A [y7]   | 786.410442  | 19.5             | 9.7                  |
|           |                    |                                |               | E [y5]   | 602.289265  | 13.5             |                      |
|           |                    |                                |               | P [y4]   | 473.246672  | 22.5             |                      |
|           |                    |                                |               | A [b3]   | 284.196868  | 16.5             |                      |
|           | A0A2I4E5L6         | LFETDPK.light                  | 425.221268    | E [y5]   | 589.282782  | 11.2             | 9.2                  |
|           |                    |                                |               | P [y2]   | 244.165568  | 14.2             |                      |
|           |                    |                                |               | K [y1]   | 147.112804  | 23.2             |                      |
|           | P93198             | DLPNEC[+57.021464]GISSQR.light | 688.317165    | N [y9]   | 1050.463283 | 31.3             | 9.1                  |
|           |                    |                                |               | G [y6]   | 647.347114  | 31.3             |                      |
|           |                    |                                |               | S [y4]   | 477.241586  | 31.3             |                      |
|           |                    |                                |               | R [y1]   | 175.118952  | 31.3             |                      |
|           | Q2TPW5             | LDALEPTNR.light                | 514.772188    | L [y6]   | 729.388979  | 17               | 9.3                  |
|           |                    |                                |               | E [y5]   | 616.304915  | 17               |                      |
|           |                    |                                |               | P [y4]   | 487.262322  | 20               |                      |
|           |                    |                                |               | A [b3]   | 300.155397  | 20               |                      |

**Table S2.** Continued

|                    | Allergenic protein | Biomarker peptide | Precursor Ion | Fragment | Product Ion | Collision Energy | Retention time (min) |
|--------------------|--------------------|-------------------|---------------|----------|-------------|------------------|----------------------|
| Internal standards | Int-STD            | GWGG.light        | 376.161545    | W [y3]   | 319.140081  | 9.7              | 8.3                  |
|                    |                    |                   |               | G [y2]   | 301.129516  | 9.7              |                      |
|                    |                    |                   |               | G [y1]   | 244.108053  | 9.7              |                      |
|                    |                    |                   |               | W [b2]   | 133.060768  | 9.7              |                      |
|                    |                    |                   |               | G [b3]   | 76.039304   | 15.7             |                      |
|                    | IS FGF23           | DPLNVLKPR.heavy   | 530.347866    | P [y8]   | 944.661512  | 26.3             | 10.5                 |
|                    |                    |                   |               | K [b7]   | 788.524015  | 14.3             |                      |
|                    |                    |                   |               | V [y5]   | 620.481757  | 23.3             |                      |
|                    |                    |                   |               | V [b5]   | 547.344988  | 20.3             |                      |
|                    |                    |                   |               | L [y4]   | 513.350743  | 23.3             |                      |
|                    |                    |                   |               | N [b4]   | 440.213974  | 23.3             |                      |

**Table S3.** LC-MS/MS method validation results of almond allergenic proteins

| Validation criterion    | A0A516F3L2<br>(WPQQQEQLR) | E3SH28<br>(NQIIR) | Q8GSL5<br>(GSGGITVK) | Q945K2<br>(VLVLER) |
|-------------------------|---------------------------|-------------------|----------------------|--------------------|
| Repeatability (% RSD)   | 3.42                      | 1.19              | 4.69                 | 3.92               |
| Reproducibility (% RSD) | 2.68                      | 1.94              | 2.38                 | 3.74               |
| Linearity ( $R^2$ )     | 0.9935                    | 0.9880            | 0.9799               | 0.9938             |
| LoD (ng flour)          | 37.947                    | 37.531            | 38.372               | 35.604             |
| LoQ (ng flour)          | 126.489                   | 125.103           | 127.906              | 118.681            |

RSD = relative standard deviation. LoD = limit of detection. LoQ = limit of quantification.

**Table S4.** LC-MS/MS method validation results of cashew allergenic proteins

| Validation criterion    | Q8GZP6 (GGIVK) | Q8H2B8<br>(ELYETASELPR) | Q8L5L5<br>(VLLPK) |
|-------------------------|----------------|-------------------------|-------------------|
| Repeatability (% RSD)   | 5.47           | 4.55                    | 1.92              |
| Reproducibility (% RSD) | 6.66           | 1.20                    | 0.13              |
| Linearity ( $R^2$ )     | 0.9834         | 0.9875                  | 0.9904            |
| LoD (ng flour)          | 69.932         | 29.615                  | 48.371            |
| LoQ (ng flour)          | 233.107        | 98.716                  | 161.237           |

**Table S5.** LC-MS/MS method validation results of hazelnut allergenic proteins

| Validation criterion    | A0A0U1VZC8<br>(AVDDPR) | D0PWG2<br>(EVMETAR) | Q8S4P9<br>(VFGEQSK) | Q9ATH2<br>(CGVNIPYK) |
|-------------------------|------------------------|---------------------|---------------------|----------------------|
| Repeatability (% RSD)   | 1.25                   | 0.54                | 0.65                | 4.49                 |
| Reproducibility (% RSD) | 1.86                   | 2.39                | 0.68                | 1.60                 |
| Linearity ( $R^2$ )     | 0.9981                 | 0.9907              | 0.9824              | 0.9932               |
| LoD (ng flour)          | 39.479                 | 18.389              | 12.305              | 13.018               |
| LoQ (ng flour)          | 131.598                | 61.296              | 41.018              | 43.395               |

**Table S6.** LC-MS/MS method validation results for the analysis of peanut allergenic proteins

| Validation criterion    | B6CEX8<br>(GLLGALR) | Q6PSU2<br>(CDLEVESGGR) | Q647G9<br>(CDLDVSGGR) | O82580<br>(LQGEDQSQQQR) |
|-------------------------|---------------------|------------------------|-----------------------|-------------------------|
| Repeatability (% RSD)   | 1.90                | 5.45                   | 0.23                  | 3.44                    |
| Reproducibility (% RSD) | 2.02                | 3.07                   | 6.81                  | 6.10                    |
| Linearity ( $R^2$ )     | 0.9956              | 0.9961                 | 0.9955                | 0.9884                  |
| LoD (ng flour)          | 29.051              | 10.745                 | 9.193                 | 19.118                  |
| LoQ (ng flour)          | 96.835              | 35.815                 | 30.644                | 63.728                  |

**Table S7.** LC-MS/MS method validation results of pistachio allergenic proteins

| <b>Validation criterion</b> | <b>B4X640<br/>(VVVLPK)</b> | <b>B7P072<br/>(QQQQGQFR)</b> | <b>B7P073<br/>(ALPLDVIK)</b> | <b>B7SLJ1<br/>(AMISPLAGSTSVLR)</b> |
|-----------------------------|----------------------------|------------------------------|------------------------------|------------------------------------|
| Repeatability (% RSD)       | 2.11                       | 7.85                         | 4.65                         | 6.99                               |
| Reproducibility (% RSD)     | 3.43                       | 6.94                         | 3.23                         | 5.77                               |
| Linearity ( $R^2$ )         | 0.9867                     | 0.9728                       | 0.9850                       | 0.9703                             |
| LoD (ng flour)              | 42.757                     | 23.343                       | 35.079                       | 24.031                             |
| LoQ (ng flour)              | 142.522                    | 77.811                       | 116.931                      | 80.104                             |

**Table S8.** LC-MS/MS method validation results of walnut allergenic proteins

| <b>Validation criterion</b> | <b>A0A1L6K371<br/>(LVALEPSNR)</b> | <b>A0A2I4E5L6<br/>(LFETDPK)</b> | <b>P93198<br/>(DLPNECGISSQR)</b> | <b>Q2TPW5<br/>(LDALEPTNR)</b> |
|-----------------------------|-----------------------------------|---------------------------------|----------------------------------|-------------------------------|
| Repeatability (% RSD)       | 1.47                              | 0.13                            | 0.97                             | 1.25                          |
| Reproducibility (% RSD)     | 2.51                              | 2.31                            | 2.63                             | 0.77                          |
| Linearity ( $R^2$ )         | 0.9861                            | 0.9848                          | 0.9867                           | 0.9919                        |
| LoD (ng flour)              | 36.549                            | 37.665                          | 34.469                           | 35.881                        |
| LoQ (ng flour)              | 121.831                           | 125.550                         | 114.895                          | 119.605                       |

**Table S9.** LC-MS/MS method validation results of two peptides used as internal standards

| <b>Validation criterion</b> | <b>IS - GWGG</b> | <b>IS - DPLNVLKPR</b> |
|-----------------------------|------------------|-----------------------|
| Repeatability (% RSD)       | 1.87             | 0.91                  |
| Reproducibility (% RSD)     | 3.39             | 4.80                  |
| Linearity ( $R^2$ )         | 0.9987           | 0.9988                |
| LoD (pg peptide)            | 13.170           | 11.797                |
| LoQ (pg peptide)            | 43.900           | 39.322                |
